# Supplementary material for: RAP1 Protects from Obesity through Its Extratelomeric Role Regulating Gene Expression
Source: PubMed Central journal article supplement (PMC5889507; doi:10.1016/j.celrep.2013.05.030), 2013-06-20
Supplement: NIHMS948947-supplement-36.pdf [file NIHMS948947-supplement-36.pdf]

**Table S1. Plasma Analysis of Metabolic Parameters in Male and Female Mice Subjected Either to Standard Diet or to a High-Fat Diet, Related to Figure 3**

\*, p=0.05; \*\*, p<0.01.

| <b>MALES</b>          | <b>Standard Diet</b>      |                           | <b>High fat diet</b>      |                           |
|-----------------------|---------------------------|---------------------------|---------------------------|---------------------------|
|                       | <i>Rap1<sup>+/+</sup></i> | <i>Rap1<sup>-/-</sup></i> | <i>Rap1<sup>+/+</sup></i> | <i>Rap1<sup>-/-</sup></i> |
| Weight (g)            | 42.1 ± 3.7                | 47.6 ± 2.5                | 44.9 ± 3.0                | 48.5 ± 1.5                |
| Albumin (g/L)         | 35.9 ± 1.1                | 36.1 ± 2.7                | 35.1 ± 1.0                | 34.7 ± 0.6                |
| Bilirubin (µmol/L)    | 2.6 ± 0.4                 | 3.6 ± 1.2                 | 5.9 ± 3.0                 | 2.5 ± 0.2                 |
| Calcium (mmol/L)      | 2.3 ± 0.1                 | 2.1 ± 0                   | 2.2 ± 0.1                 | 2.2 ± 0                   |
| Phosphorous (mmol/L)  | 3.2 ± 0.3                 | 4.0 ± 0.5                 | 2.5 ± 0.1                 | 2.3 ± 0.1                 |
| Total proteins (g/dL) | 7.2 ± 0.2                 | 6.9 ± 0.2                 | 6.4 ± 0.3                 | 6.3 ± 0.2                 |
| Urea (mg/dL)          | 64.8 ± 9.0                | 64.0 ± 5.2                | 56.6 ± 3.1                | 54.9 ± 4.1                |
| Creatinine (µmol/L)   | 13.1 ± 4.1                | 11.3 ± 1.3                | 10.3 ± 1.6                | 12.1 ± 1.3                |
| Cholesterol (mg/L)    | 146.9 ± 6.7               | 132.4 ± 25.4              | 194.4 ± 25.9              | 181.3 ± 8.3               |
| HDL (mg/dL)           | 53.0 ± 8.0                | 65.2 ± 2.6                | 72.3 ± 4.4                | 68.5 ± 2.9                |
| LDL (mg/dL)           | 10.0 ± 0.7                | 12.5 ± 1.3                | 24.8 ± 4.3                | 21.8 ± 2.6                |
| Triglycerides (mg/dL) | 123.0 ± 13.1              | 121 ± 9.0                 | 124.3 ± 11.3              | 114.4 ± 8.4               |
| ALT (U/L)             | 35.88 ± 3.0               | 49.64 ± 9.2               | 195.12 ± 87               | 111.6 ± 28                |
| Glucose (mmol/L)      | 5.4 ± 1.5                 | 5.1 ± 0.2                 | 5.4 ± 1.5                 | 4.0 ± 0.8                 |
| <b>FEMALES</b>        | <b>Standard Diet</b>      |                           | <b>High fat diet</b>      |                           |
|                       | <i>Rap1<sup>+/+</sup></i> | <i>Rap1<sup>-/-</sup></i> | <i>Rap1<sup>+/+</sup></i> | <i>Rap1<sup>-/-</sup></i> |
| Weight (g)            | 28.9 ± 3.1                | 49.5 ± 4.6 **             | 32.6 ± 3.5                | 44.0 ± 2.7**              |
| Albumin (g/L)         | 32.6 ± 2.2                | 34.2 ± 2.5                | 34.0 ± 1.9                | 35.7 ± 1.0                |
| Bilirubin (µmol/L)    | 4.0 ± 0.9                 | 1.7 ± 0.2                 | 2.6 ± 0.2                 | 2.6 ± 0.2                 |
| Calcium (mmol/L)      | 2.1 ± 0.1                 | 2.3 ± 0                   | 2.3 ± 0.1                 | 2.4 ± 0.1                 |
| Phosphorous (mmol/L)  | 3.2 ± 0.3                 | 2.7 ± 0.2                 | 2.1 ± 0.2                 | 2.5 ± 0.3                 |
| Total proteins (g/dL) | 6.1 ± 0.6                 | 6.5 ± 0.1                 | 6.5 ± 0.3                 | 6.7 ± 0.2                 |
| Urea (mg/dL)          | 60.9 ± 3.6                | 57.5 ± 1.8                | 57.8 ± 2.9                | 58.8 ± 2.6                |
| Creatinine (µmol/L)   | 15.8 ± 3.0                | 7.9 ± 1.2                 | 13.6 ± 1.8                | 12.1 ± 2.1                |
| Cholesterol (mg/L)    | 85.6 ± 18.6               | 118.6 ± 4*                | 112.4 ± 12                | 159 ± 10**                |
| HDL (mg/dL)           | 41.3 ± 8.9                | 44.3 ± 4.8                | 51.0 ± 5.1                | 62.5 ± 1.4                |
| LDL (mg/dL)           | 9.6 ± 0.8                 | 11.6 ± 1.6                | 13.3 ± 0.6                | 18.6 ± 1.3**              |

|                       |             |               |             |             |
|-----------------------|-------------|---------------|-------------|-------------|
| Triglycerides (mg/dL) | 136.7 ± 10  | 120.7 ± 7.5   | 115.5 ± 5.8 | 111.7 ± 5.6 |
| ALT (U/L)             | 54.1 ± 14.6 | 129.53 ± 38** | 58.55 ± 20  | 187 ± 38**  |
| Glucose (mmol/L)      | 4.1 ± 1.4   | 5.5 ± 0.2     | 5.0 ± 0.5   | 4.3 ± 0.6   |

**Table S2. Significantly Enriched Gene Sets Found in the Livers of 10-Week-Old *Rap1*<sup>-/-</sup> Females, Related to Figure 6**

FDR: False Discovery Rate, NES: Normalized Enrichment Score. FDR<0.25.

| Gene Set Name                                       | # Genes | NES       | FDR q-val   | Source   | Rab1 -/- status |
|-----------------------------------------------------|---------|-----------|-------------|----------|-----------------|
| BIOSYNTHESIS OF STEROIDS                            | 23      | 2.5169961 | 0           | KEGG     | UP              |
| DRUG METABOLISM - CYTOCHROME P450                   | 75      | 2.351679  | 0           | KEGG     | UP              |
| ANDROGEN AND ESTROGEN METABOLISM                    | 34      | 2.1567147 | 0           | KEGG     | UP              |
| CHOLESTEROL BIOSYNTHESIS                            | 19      | 2.4279442 | 0           | REACTOME | UP              |
| METABOLISM OF XENOBIOTICS BY CYTOCHROME P450        | 66      | 2.1008756 | 8.69E-04    | KEGG     | UP              |
| BILE ACID BIOSYNTHESIS                              | 29      | 2.0114846 | 9.04E-04    | KEGG     | UP              |
| TRYPTOPHAN METABOLISM                               | 42      | 2.0153143 | 0.001017382 | KEGG     | UP              |
| PROPANOATE METABOLISM                               | 29      | 2.0290937 | 0.001162723 | KEGG     | UP              |
| DRUG METABOLISM - OTHER ENZYMES                     | 46      | 2.0367715 | 0.00135651  | KEGG     | UP              |
| VALINE, LEUCINE AND ISOLEUCINE DEGRADATION          | 45      | 2.0415428 | 0.001379811 | KEGG     | UP              |
| BUTANOATE METABOLISM                                | 40      | 1.9751942 | 0.001500798 | KEGG     | UP              |
| RETINOL METABOLISM                                  | 62      | 1.8931497 | 0.004285994 | KEGG     | UP              |
| BIOLOGICAL OXIDATIONS                               | 119     | 2.0317812 | 0.007228908 | REACTOME | UP              |
| ACTIVATION OF THE PRE-REPLICATIVE COMPLEX           | 29      | 1.9477711 | 0.017360628 | REACTOME | UP              |
| PYRIMIDINE METABOLISM                               | 89      | 1.7511019 | 0.01925754  | KEGG     | UP              |
| HISTIDINE METABOLISM                                | 27      | 1.7580942 | 0.019640766 | KEGG     | UP              |
| SPHINGOLIPID METABOLISM                             | 36      | 1.7398285 | 0.020183748 | KEGG     | UP              |
| ACTIVATION OF ATR IN RESPONSE TO REPLICATION STRESS | 35      | 1.9065479 | 0.020955402 | REACTOME | UP              |
| PORPHYRIN AND CHLOROPHYLL METABOLISM                | 32      | 1.7142601 | 0.024497299 | KEGG     | UP              |
| OXIDATIVE PHOSPHORYLATION                           | 110     | 1.699594  | 0.025012853 | KEGG     | UP              |
| FATTY ACID METABOLISM                               | 43      | 1.703376  | 0.025527395 | KEGG     | UP              |
| PYRUVATE METABOLISM                                 | 40      | 1.681831  | 0.02740653  | KEGG     | UP              |
| P450 HYDROXYLATIONS                                 | 17      | 1.8235364 | 0.029125301 | REACTOME | UP              |
| P450 DEHYDROGENATION OF ALKANES TO FORM ALKENES     | 19      | 1.8323857 | 0.030639747 | REACTOME | UP              |
| DNA REPLICATION                                     | 96      | 1.8384043 | 0.03243205  | REACTOME | UP              |
| DNA REPLICATION PRE-INITIATION                      | 75      | 1.8597062 | 0.03294014  | REACTOME | UP              |
| PURINE METABOLISM                                   | 144     | 1.6597061 | 0.0333265   | KEGG     | UP              |
| FATTY ACIDS                                         | 15      | 1.7806872 | 0.04325612  | REACTOME | UP              |
| M/G1 TRANSITION                                     | 61      | 1.7169871 | 0.04422614  | REACTOME | UP              |
| PHASE 1 - FUNCTIONALIZATION OF COMPOUNDS            | 71      | 1.7568594 | 0.04476819  | REACTOME | UP              |
| CELL CYCLE CHECKPOINTS                              | 116     | 1.7089447 | 0.045446668 | REACTOME | UP              |
| ELECTRON TRANSPORT CHAIN                            | 62      | 1.7455995 | 0.046201337 | REACTOME | UP              |
| LIPID AND LIPOPROTEIN METABOLISM                    | 180     | 1.7636501 | 0.046276826 | REACTOME | UP              |
| BRANCHED-CHAIN AMINO ACID CATABOLISM                | 22      | 1.7193013 | 0.046503764 | REACTOME | UP              |
| ASSEMBLY OF THE PRE-REPLICATIVE COMPLEX             | 61      | 1.7319005 | 0.04792924  | REACTOME | UP              |
| ORC1 REMOVAL FROM CHROMATIN                         | 68      | 1.6947447 | 0.048778545 | REACTOME | UP              |
| G2/M CHECKPOINTS                                    | 45      | 1.7210207 | 0.04892913  | REACTOME | UP              |
| GLUTATHIONE CONJUGATION                             | 18      | 1.685878  | 0.049869407 | REACTOME | UP              |
| ATP FORMATION                                       | 21      | 1.6560509 | 0.050344132 | REACTOME | UP              |
| DNA STRAND ELONGATION                               | 29      | 1.668273  | 0.05125659  | REACTOME | UP              |

|                                                                                                          |     |            |             |          |      |
|----------------------------------------------------------------------------------------------------------|-----|------------|-------------|----------|------|
| FURTHER PLATELET RELEASATE                                                                               | 37  | 1.6615132  | 0.05128681  | REACTOME | UP   |
| FORMATION OF PLATELET PLUG                                                                               | 116 | 1.6639029  | 0.051657442 | REACTOME | UP   |
| EXOCYTOSIS OF ALPHA GRANULE                                                                              | 70  | 1.6563364  | 0.052242845 | REACTOME | UP   |
| TYROSINE METABOLISM                                                                                      | 36  | 1.601104   | 0.053438894 | KEGG     | UP   |
| CYTOCHROME P450                                                                                          | 25  | 1.6686112  | 0.0535614   | REACTOME | UP   |
| HEMOSTASIS                                                                                               | 233 | 1.6699935  | 0.055531364 | REACTOME | UP   |
| DNA REPLICATION                                                                                          | 35  | 1.5892345  | 0.05606858  | KEGG     | UP   |
| GLUTATHIONE METABOLISM                                                                                   | 53  | 1.584594   | 0.05608329  | KEGG     | UP   |
| COMPLEMENT AND COAGULATION CASCADES                                                                      | 70  | 1.5644605  | 0.06346488  | KEGG     | UP   |
| UREA CYCLE AND METABOLISM OF AMINO GROUPS                                                                | 27  | 1.5336365  | 0.070784725 | KEGG     | UP   |
| ECM-RECEPTOR INTERACTION                                                                                 | 79  | 1.5421149  | 0.072123595 | KEGG     | UP   |
| GLYCINE, SERINE AND THREONINE METABOLISM                                                                 | 44  | 1.5353991  | 0.07251592  | KEGG     | UP   |
| FORMATION OF FIBRIN CLOT (CLOTTING CASCADE)                                                              | 29  | 1.6077151  | 0.07336275  | REACTOME | UP   |
| CYTOCHROME P450 - ARRANGED BY SUBSTRATE TYPE                                                             | 50  | 1.6014193  | 0.074300565 | REACTOME | UP   |
| LINOLEIC ACID METABOLISM                                                                                 | 40  | 1.5079641  | 0.084434725 | KEGG     | UP   |
| G1/S TRANSITION                                                                                          | 109 | 1.5702939  | 0.0924462   | REACTOME | UP   |
| NUCLEOTIDE METABOLISM                                                                                    | 82  | 1.564307   | 0.09304774  | REACTOME | UP   |
| ELEVATION OF CYTOSOLIC CA <sup>++</sup> LEVELS                                                           | 82  | 1.5488926  | 0.09932146  | REACTOME | UP   |
| GLUCONEOGENESIS                                                                                          | 33  | 1.5512133  | 0.100048825 | REACTOME | UP   |
| CDT1 ASSOCIATION WITH THE CDC6:ORC:ORIGIN COMPLEX                                                        | 55  | 1.5378649  | 0.10466529  | REACTOME | UP   |
| NUCLEOTIDE EXCISION REPAIR                                                                               | 40  | 1.4483975  | 0.12484158  | KEGG     | UP   |
| CITRATE CYCLE (TCA CYCLE)                                                                                | 30  | 1.4495149  | 0.12825158  | KEGG     | UP   |
| FGFR4 LIGAND BINDING AND ACTIVATION                                                                      | 15  | -1.7794468 | 0.1311975   | REACTOME | DOWN |
| PENTOSE AND GLUCURONATE INTERCONVERSIONS                                                                 | 18  | 1.4361193  | 0.1322497   | KEGG     | UP   |
| METABOLISM OF NITRIC OXIDE                                                                               | 25  | 1.4967877  | 0.1385311   | REACTOME | UP   |
| METHIONINE METABOLISM                                                                                    | 21  | 1.4033546  | 0.16125782  | KEGG     | UP   |
| INSULIN SYNTHESIS AND SECRETION                                                                          | 54  | 1.4575654  | 0.16826625  | REACTOME | UP   |
| CELL CYCLE, MITOTIC                                                                                      | 317 | 1.4583124  | 0.17213766  | REACTOME | UP   |
| ORNITHINE METABOLISM                                                                                     | 53  | 1.4614093  | 0.1739477   | REACTOME | UP   |
| NRAGE SIGNALS DEATH THROUGH JNK                                                                          | 15  | -1.6779176 | 0.17573065  | REACTOME | DOWN |
| AMINOACYL-TRNA BIOSYNTHESIS                                                                              | 42  | 1.383633   | 0.17774573  | KEGG     | UP   |
| SELENOAMINO ACID METABOLISM                                                                              | 22  | 1.3783097  | 0.1780914   | KEGG     | UP   |
| APC/C:CDH1 MEDIATED DEGRADATION OF CDC20 AND OTHER APC/C:CDH1 TARGETED PROTEINS IN LATE MITOSIS/EARLY G1 | 71  | 1.4450498  | 0.17934485  | REACTOME | UP   |
| COLLAGEN-MEDIATED ACTIVATION CASCADE                                                                     | 16  | 1.4328508  | 0.18744712  | REACTOME | UP   |
| CYCLIN A:CDK2-ASSOCIATED EVENTS AT S PHASE ENTRY                                                         | 64  | 1.4344866  | 0.18998687  | REACTOME | UP   |
| DNA REPAIR                                                                                               | 98  | 1.4264888  | 0.19095255  | REACTOME | UP   |
| PARKINSON'S DISEASE                                                                                      | 110 | 1.3624933  | 0.1911234   | KEGG     | UP   |
| AUTODEGRADATION OF CDH1 BY CDH1:APC/C                                                                    | 63  | 1.4145646  | 0.19322754  | REACTOME | UP   |
| CHYLOMICRON-MEDIATED LIPID TRANSPORT                                                                     | 16  | 1.4162815  | 0.19504194  | REACTOME | UP   |
| APC/C:CDK20 MEDIATED DEGRADATION OF SECURIN                                                              | 64  | 1.4187945  | 0.19619536  | REACTOME | UP   |
| INTEGRIN CELL SURFACE INTERACTIONS                                                                       | 91  | 1.4010003  | 0.20655149  | REACTOME | UP   |

|                                                        |                 |    |           |            |          |    |
|--------------------------------------------------------|-----------------|----|-----------|------------|----------|----|
| <b>CDC20:PHOSPHO-APC/C<br/>DEGRADATION OF CYCLIN A</b> | <b>MEDIATED</b> | 68 | 1.3953516 | 0.20984785 | REACTOME | UP |
| <b>DOUBLE-STRAND BREAK REPAIR</b>                      |                 | 31 | 1.3887703 | 0.21332806 | REACTOME | UP |
| <b>G-PROTEIN ACTIVATION</b>                            |                 | 25 | 1.3749077 | 0.22127932 | REACTOME | UP |
| <b>G2/M TRANSITION</b>                                 |                 | 97 | 1.3807743 | 0.22167584 | REACTOME | UP |
| <b>MEMBRANE TRAFFICKING</b>                            |                 | 58 | 1.3684113 | 0.2217279  | REACTOME | UP |
| <b>DUAL INCISION REACTION IN GG-NER</b>                |                 | 21 | 1.3698521 | 0.2241191  | REACTOME | UP |
| <b>FORMATION OF INCISION COMPLEX IN GG-NER</b>         |                 | 21 | 1.375531  | 0.22492968 | REACTOME | UP |
| <b>PPAR SIGNALING PATHWAY</b>                          |                 | 74 | 1.3206327 | 0.23484382 | KEGG     | UP |
| <b>ALANINE AND ASPARTATE METABOLISM</b>                |                 | 29 | 1.3252659 | 0.23598894 | KEGG     | UP |
| <b>METABOLISM OF VITAMINS AND COFACTORS</b>            |                 | 46 | 1.3481523 | 0.24488553 | REACTOME | UP |
| <b>MISMATCH REPAIR</b>                                 |                 | 22 | 1.3085029 | 0.24567536 | KEGG     | UP |

**Table S3. Significantly Enriched Gene Sets Found in Gonadal White Fat Tissue of *Rap1*<sup>-/-</sup> Females, Related to Figure 6**

FDR: False Discovery Rate, NES: Normalized Enrichment Score. FDR<0.25.

| Gene Set Name                                        | # Genes | NES        | FDR q-val   | Source       | Rab1 -/- status |
|------------------------------------------------------|---------|------------|-------------|--------------|-----------------|
| ECM-RECEPTOR INTERACTION                             | 79      | 2.004533   | 0.00552448  | KEGG         | UP              |
| PYRUVATE METABOLISM                                  | 40      | -1.9658341 | 0.009929905 | KEGG         | DOWN            |
| BLADDER CANCER                                       | 42      | 1.9007902  | 0.013026089 | KEGG         | UP              |
| MAPK SIGNALING PATHWAY                               | 257     | 1.8657416  | 0.016694758 | KEGG         | UP              |
| FOCAL ADHESION                                       | 190     | 1.8328364  | 0.020281324 | KEGG         | UP              |
| PROPANOATE METABOLISM                                | 29      | -1.7186533 | 0.05040007  | KEGG         | DOWN            |
| PPAR SIGNALING PATHWAY                               | 74      | -1.727355  | 0.05786784  | KEGG         | DOWN            |
| CITRATE CYCLE (TCA CYCLE)                            | 30      | -1.6800555 | 0.059602737 | KEGG         | DOWN            |
| ELECTRON TRANSPORT CHAIN                             | 62      | -1.8369874 | 0.06062995  | REACTO<br>ME | DOWN            |
| GLUCOSE METABOLISM                                   | 77      | -1.7885938 | 0.061885286 | REACTO<br>ME | DOWN            |
| BIOSYNTHESIS OF UNSATURATED FATTY ACIDS              | 30      | -1.6574196 | 0.06351131  | KEGG         | DOWN            |
| GLYCOLYSIS                                           | 22      | -1.8915594 | 0.06478297  | REACTO<br>ME | DOWN            |
| TGF-BETA SIGNALING PATHWAY                           | 85      | 1.7114409  | 0.07026618  | KEGG         | UP              |
| GRAFT-VERSUS-HOST DISEASE                            | 21      | -1.6271291 | 0.07157563  | KEGG         | DOWN            |
| BASAL CELL CARCINOMA                                 | 55      | 1.6884203  | 0.07370097  | KEGG         | UP              |
| OXIDATIVE PHOSPHORYLATION                            | 110     | -1.7316537 | 0.076298594 | KEGG         | DOWN            |
| HEDGEHOG SIGNALING PATHWAY                           | 53      | 1.6672674  | 0.080229335 | KEGG         | UP              |
| METABOLISM OF CARBOHYDRATES                          | 100     | -1.7306147 | 0.08141958  | REACTO<br>ME | DOWN            |
| METABOLISM OF BILE ACIDS AND BILE SALTS              | 47      | -1.6955582 | 0.08866284  | REACTO<br>ME | DOWN            |
| COMPLEMENT AND COAGULATION CASCADES                  | 70      | -1.5749704 | 0.09517886  | KEGG         | DOWN            |
| GLYCOLYSIS / GLUCONEOGENESIS                         | 53      | -1.7444655 | 0.09906602  | KEGG         | DOWN            |
| G-PROTEIN ACTIVATION                                 | 25      | 1.8571392  | 0.10200319  | REACTO<br>ME | UP              |
| COLLAGEN ADHESION VIA ALPHA 2 BETA 1<br>GLYCOPROTEIN | 16      | 1.7720693  | 0.13963076  | REACTO<br>ME | UP              |
| P53 SIGNALING PATHWAY                                | 65      | 1.562774   | 0.14037709  | KEGG         | UP              |
| FGFR1 LIGAND BINDING AND ACTIVATION                  | 20      | 1.6028283  | 0.1410056   | REACTO<br>ME | UP              |
| ALPHA-LINOLENIC ACID METABOLISM                      | 16      | 1.5832515  | 0.14237046  | KEGG         | UP              |
| FURTHER PLATELET RELEASATE                           | 37      | 1.6184621  | 0.1443063   | REACTO<br>ME | UP              |
| PROTEASOME                                           | 41      | -1.5062642 | 0.14546703  | KEGG         | DOWN            |
| BASIGIN INTERACTIONS                                 | 15      | 1.5896456  | 0.1458923   | REACTO<br>ME | UP              |
| FGFR2 LIGAND BINDING AND ACTIVATION                  | 19      | 1.6037223  | 0.15209194  | REACTO<br>ME | UP              |
| WNT SIGNALING PATHWAY                                | 146     | 1.5635965  | 0.15346472  | KEGG         | UP              |
| INTEGRIN CELL SURFACE INTERACTIONS                   | 91      | 1.6207877  | 0.15701488  | REACTO<br>ME | UP              |
| COLORECTAL CANCER                                    | 85      | 1.5840312  | 0.15961584  | KEGG         | UP              |
| ENDOGENOUS STEROLS                                   | 18      | -1.6016139 | 0.16369729  | REACTO<br>ME | DOWN            |
| EXOCYTOSIS OF ALPHA GRANULE                          | 70      | 1.5255255  | 0.17436944  | REACTO<br>ME | UP              |
| COLLAGEN-MEDIATED ACTIVATION CASCADE                 | 16      | 1.6214712  | 0.1757661   | REACTO<br>ME | UP              |

|                                                                          |     |            |            |          |      |
|--------------------------------------------------------------------------|-----|------------|------------|----------|------|
| CELL SURFACE INTERACTIONS AT THE VASCULAR WALL                           | 93  | 1.5353462  | 0.17903456 | REACTOME | UP   |
| OPIOID SIGNALLING                                                        | 82  | 1.5282247  | 0.17944291 | REACTOME | UP   |
| CYCLIN D ASSOCIATED EVENTS IN G1                                         | 17  | 1.5355306  | 0.18994336 | REACTOME | UP   |
| FGFR LIGAND BINDING AND ACTIVATION                                       | 23  | 1.6278551  | 0.19034383 | REACTOME | UP   |
| FORMATION OF PLATELET PLUG                                               | 116 | 1.6787493  | 0.19109751 | REACTOME | UP   |
| FGFR2C LIGAND BINDING AND ACTIVATION                                     | 15  | 1.5422461  | 0.19196635 | REACTOME | UP   |
| PARKINSON'S DISEASE                                                      | 110 | -1.451378  | 0.19311035 | KEGG     | DOWN |
| ARACHIDONIC ACID METABOLISM                                              | 69  | 1.484856   | 0.19386934 | KEGG     | UP   |
| CELL ADHESION MOLECULES (CAMS)                                           | 110 | 1.4999945  | 0.1983287  | KEGG     | UP   |
| G1 PHASE                                                                 | 17  | 1.5028735  | 0.19880383 | REACTOME | UP   |
| AMINE-DERIVED HORMONES                                                   | 16  | 1.5452377  | 0.200567   | REACTOME | UP   |
| PEPTIDE LIGAND-BINDING RECEPTORS                                         | 65  | 1.6365684  | 0.20280737 | REACTOME | UP   |
| B CELL RECEPTOR SIGNALING PATHWAY                                        | 65  | 1.4876983  | 0.20352997 | KEGG     | UP   |
| ELEVATION OF CYTOSOLIC CA <sup>++</sup> LEVELS                           | 82  | 1.4868823  | 0.2037268  | REACTOME | UP   |
| N-GLYCAN DEGRADATION                                                     | 15  | 1.5073115  | 0.20423242 | KEGG     | UP   |
| NRAGE SIGNALS DEATH THROUGH JNK                                          | 15  | 1.4927717  | 0.20439309 | REACTOME | UP   |
| INTEGRATION OF ENERGY METABOLISM                                         | 54  | -1.4255652 | 0.20896266 | REACTOME | DOWN |
| METABOLISM OF NITRIC OXIDE                                               | 25  | -1.4349115 | 0.21015264 | REACTOME | DOWN |
| IMMUNOREGULATORY INTERACTIONS BETWEEN A LYMPHOID AND A NON-LYMPHOID CELL | 46  | 1.4764822  | 0.21061532 | REACTOME | UP   |
| MELANOGENESIS                                                            | 100 | 1.4620317  | 0.21549417 | KEGG     | UP   |
| PHASE 1 - FUNCTIONALIZATION OF COMPOUNDS                                 | 71  | -1.4004295 | 0.21579671 | REACTOME | DOWN |
| HEMOSTASIS                                                               | 233 | 1.69418    | 0.21611644 | REACTOME | UP   |
| METABOLISM OF WATER-SOLUBLE VITAMINS AND COFACTORS                       | 46  | -1.4395648 | 0.21927734 | REACTOME | DOWN |
| LIPID AND LIPOPROTEIN METABOLISM                                         | 180 | -1.5230713 | 0.22054918 | REACTOME | DOWN |
| CITRIC ACID CYCLE (TCA CYCLE)                                            | 18  | -1.5427071 | 0.22126439 | REACTOME | DOWN |
| BRANCHED-CHAIN AMINO ACID CATABOLISM                                     | 22  | -1.4054058 | 0.22159475 | REACTOME | DOWN |
| CYTOCHROME P450 - ARRANGED BY SUBSTRATE TYPE                             | 50  | -1.4619826 | 0.22325319 | REACTOME | DOWN |
| METABOLISM OF VITAMINS AND COFACTORS                                     | 46  | -1.4479984 | 0.22469375 | REACTOME | DOWN |
| DEGRADATION OF BETA-CATENIN BY THE DESTRUCTION COMPLEX                   | 55  | -1.4727879 | 0.22477409 | REACTOME | DOWN |
| CHYLOMICRON-MEDIATED LIPID TRANSPORT                                     | 16  | -1.484501  | 0.22968222 | REACTOME | DOWN |
| CLASS A/1 (RHODOPSIN-LIKE RECEPTORS)                                     | 65  | 1.6407377  | 0.23283313 | REACTOME | UP   |
| MEMBRANE TRAFFICKING                                                     | 58  | 1.4549385  | 0.23500216 | REACTOME | UP   |
| CYTOKINE-CYTOKINE RECEPTOR INTERACTION                                   | 237 | 1.4410808  | 0.23852608 | KEGG     | UP   |
| P450 DEHYDROGENATION OF ALKANES TO FORM ALKENES                          | 19  | -1.3733454 | 0.24052711 | REACTOME | DOWN |
| FORMATION OF FIBRIN CLOT (CLOTTING CASCADE)                              | 29  | -1.4933748 | 0.24174394 | REACTOME | DOWN |

**Table S5. Overrepresentation Analysis of Gene Ontology Terms for the Significantly Deregulated Genes in *Rap1*<sup>-/-</sup> Liver, Related to Figure 6**  
FDR: False Discovery Rate. FDR<0.05.

| <b>GO BIOLOGICAL PROCESS</b> |                                                                                                                                                                            |            |                                   |
|------------------------------|----------------------------------------------------------------------------------------------------------------------------------------------------------------------------|------------|-----------------------------------|
| <b>GO term ID</b>            | <b>GO term description</b>                                                                                                                                                 | <b>FDR</b> | <b>Rap1 <sup>-/-</sup> status</b> |
| GO:0006082                   | organic acid metabolic process                                                                                                                                             | 3.96E-03   | UP                                |
| GO:0019752                   | carboxylic acid metabolic process                                                                                                                                          | 3.96E-03   | UP                                |
| GO:0044255                   | cellular lipid metabolic process                                                                                                                                           | 3.96E-03   | UP                                |
| GO:0008202                   | steroid metabolic process                                                                                                                                                  | 1.17E-02   | UP                                |
| GO:0006631                   | fatty acid metabolic process                                                                                                                                               | 1.23E-02   | UP                                |
| GO:0006629                   | lipid metabolic process                                                                                                                                                    | 1.62E-02   | UP                                |
| GO:0008203                   | cholesterol metabolic process                                                                                                                                              | 4.30E-02   | UP                                |
| GO:0007623                   | circadian rhythm                                                                                                                                                           | 4.45E-02   | DOWN                              |
| GO:0010033                   | response to organic substance                                                                                                                                              | 4.45E-02   | DOWN                              |
| <b>GO CELLULAR COMPONENT</b> |                                                                                                                                                                            |            |                                   |
| <b>GO term ID</b>            | <b>GO term description</b>                                                                                                                                                 | <b>FDR</b> | <b>Rap1 <sup>-/-</sup> status</b> |
| GO:0005783                   | endoplasmic reticulum                                                                                                                                                      | 4.73E-05   | UP                                |
| GO:0019866                   | organelle inner membrane                                                                                                                                                   | 1.12E-02   | UP                                |
| GO:0005792                   | microsome                                                                                                                                                                  | 2.13E-02   | UP                                |
| GO:0042175                   | nuclear outer membrane-endoplasmic reticulum membrane network                                                                                                              | 2.13E-02   | UP                                |
| GO:0042598                   | vesicular fraction                                                                                                                                                         | 2.20E-02   | UP                                |
| GO:0000267                   | cell fraction                                                                                                                                                              | 2.27E-02   | UP                                |
| GO:0009986                   | cell surface                                                                                                                                                               | 4.29E-02   | UP                                |
| GO:0044429                   | mitochondrial part                                                                                                                                                         | 4.29E-02   | UP                                |
| GO:0031225                   | anchored to membrane                                                                                                                                                       | 4.29E-02   | UP                                |
| GO:0046658                   | anchored to plasma membrane                                                                                                                                                | 4.29E-02   | UP                                |
| GO:0005579                   | membrane attack complex                                                                                                                                                    | 0.0485849  | DOWN                              |
| GO:0005783                   | endoplasmic reticulum                                                                                                                                                      | 0.0485849  | DOWN                              |
| <b>GO MOLECULAR FUNCTION</b> |                                                                                                                                                                            |            |                                   |
| <b>GO term ID</b>            | <b>GO term description</b>                                                                                                                                                 | <b>FDR</b> | <b>Rap1 <sup>-/-</sup> status</b> |
| GO:0004497                   | monooxygenase activity                                                                                                                                                     | 0.00596968 | DOWN                              |
| GO:0016705                   | oxidoreductase activity, acting on paired donors, with incorporation or reduction of molecular oxygen                                                                      | 0.00698089 | DOWN                              |
| GO:0042802                   | identical protein binding                                                                                                                                                  | 1.06E-02   | UP                                |
| GO:0020037                   | heme binding                                                                                                                                                               | 0.0163961  | DOWN                              |
| GO:0016709                   | oxidoreductase activity, acting on paired donors, with incorporation or reduction of molecular oxygen, NADH or NADPH as one donor, and incorporation of one atom of oxygen | 0.0163961  | DOWN                              |
| GO:0005549                   | odorant binding                                                                                                                                                            | 0.0163961  | DOWN                              |
| GO:0005550                   | pheromone binding                                                                                                                                                          | 0.0163961  | DOWN                              |
| GO:0046906                   | tetrapyrrole binding                                                                                                                                                       | 0.0170305  | DOWN                              |
